# Supplementary material for: Critical evaluation of platelet size as a prognostic biomarker in colorectal cancer across multiple treatment settings: a retrospective cohort study
Source: Springer Nature journal article supplement (doi:10.1007/s12094-019-02037-7), 2019-01-22
Supplement: MOESM1 [file 16412332]

## CRC DATABASE

n=1,054 patients  
Jan, 1st, 2010 - Mar, 1st, 2016

## EXCLUSION

- n=53 stage I
- n=7 stage unknown
- n=1 CUP Syndrome

**CRC patients**  
**Stage II-IV**  
n=993 patients

non-mCRC (n=592)  
synchronous mCRC (n=270)  
metachronous mCRC (n=131)

## EXCLUSION

- n=259 MPV not available or not within data cut-off
- n=32 stage IV but no palliative CTX and BSC
- n=8 no curative surgery in adjuvant setting
- n=4 loss of follow-up

**ANALYSIS DATASET**  
**CRC patients, stage II-IV**  
n=690

non-mCRC (n=358)  
synchronous mCRC (n=216)  
metachronous mCRC (n=116)
