# Supplementary material for: Critical evaluation of platelet size as a prognostic biomarker in colorectal cancer across multiple treatment settings: a retrospective cohort study
Source: Springer Nature journal article supplement (doi:10.1007/s12094-019-02037-7), 2019-01-22
Supplement: MOESM2 [file 16412332]

**332 patients with metastatic disease (100%)**  
**Temporality: Synchronous metastasis (n=216), Metachronous metastasis (n=116)**

**No 1st line (n=70)**  
**-> Reduced performance status (n=42)**  
**-> Unknown (n=18)**  
**-> Declined therapy (n=9)**  
**-> Other reasons (n=2)**

**262 patients undergoing 1st line therapy**  
**231 entering analysis (100%)**  
**Most frequent therapies: FOLFOX (n=46), Capecitabine (n=35), FOLFOX+Bev (n=41)**

**CR (n=4 (2%))**

**PR (n=59 (26%))**

**SD (n=61 (26%))**

**PD (n=66 (29%))**

**NE (n=40 (17%))**

**No 2nd line (n=110)**  
**-> Reduced performance status (n=56)**  
**-> Still receiving 1st line at documentation (n=12)**  
**-> Unknown (n=29)**

**152 patients undergoing 2nd line therapy**  
**117 entering analysis (100%)**  
**Most frequent therapies: FOLFIRI+Bev (n=21), FOLFIRI (n=16), FOLFOX+Bev (n=15)**

**CR (n=0 (0%))**

**PR (n=24 (21%))**

**SD (n=32 (27%))**

**PD (n=42 (36%))**

**NE (n=19 (16%))**

**No 3rd line (n=81)**  
**-> Reduced performance status (n=36)**  
**-> Still receiving 2nd line at documentation (n=15)**  
**-> Unknown (n=14)**

**71 patients undergoing 3rd line therapy**  
**55 entering analysis (100%)**  
**Most frequent therapies: Irinotecan+aEGFR (n=8), FOLFIRI+Bev (n=7), aEGFR Monotherapy (n=6)**

**CR (n=1 (2%))**

**PR (n=87 (13%))**

**SD (n=10 (18%))**

**PD (n=25 (45%))**

**NE (n=12 (22%))**
