# Supplementary figures and images for: Critical evaluation of platelet size as a prognostic biomarker in colorectal cancer across multiple treatment settings: a retrospective cohort study
Source: Springer Nature journal article supplement (doi:10.1007/s12094-019-02037-7), 2019-01-22

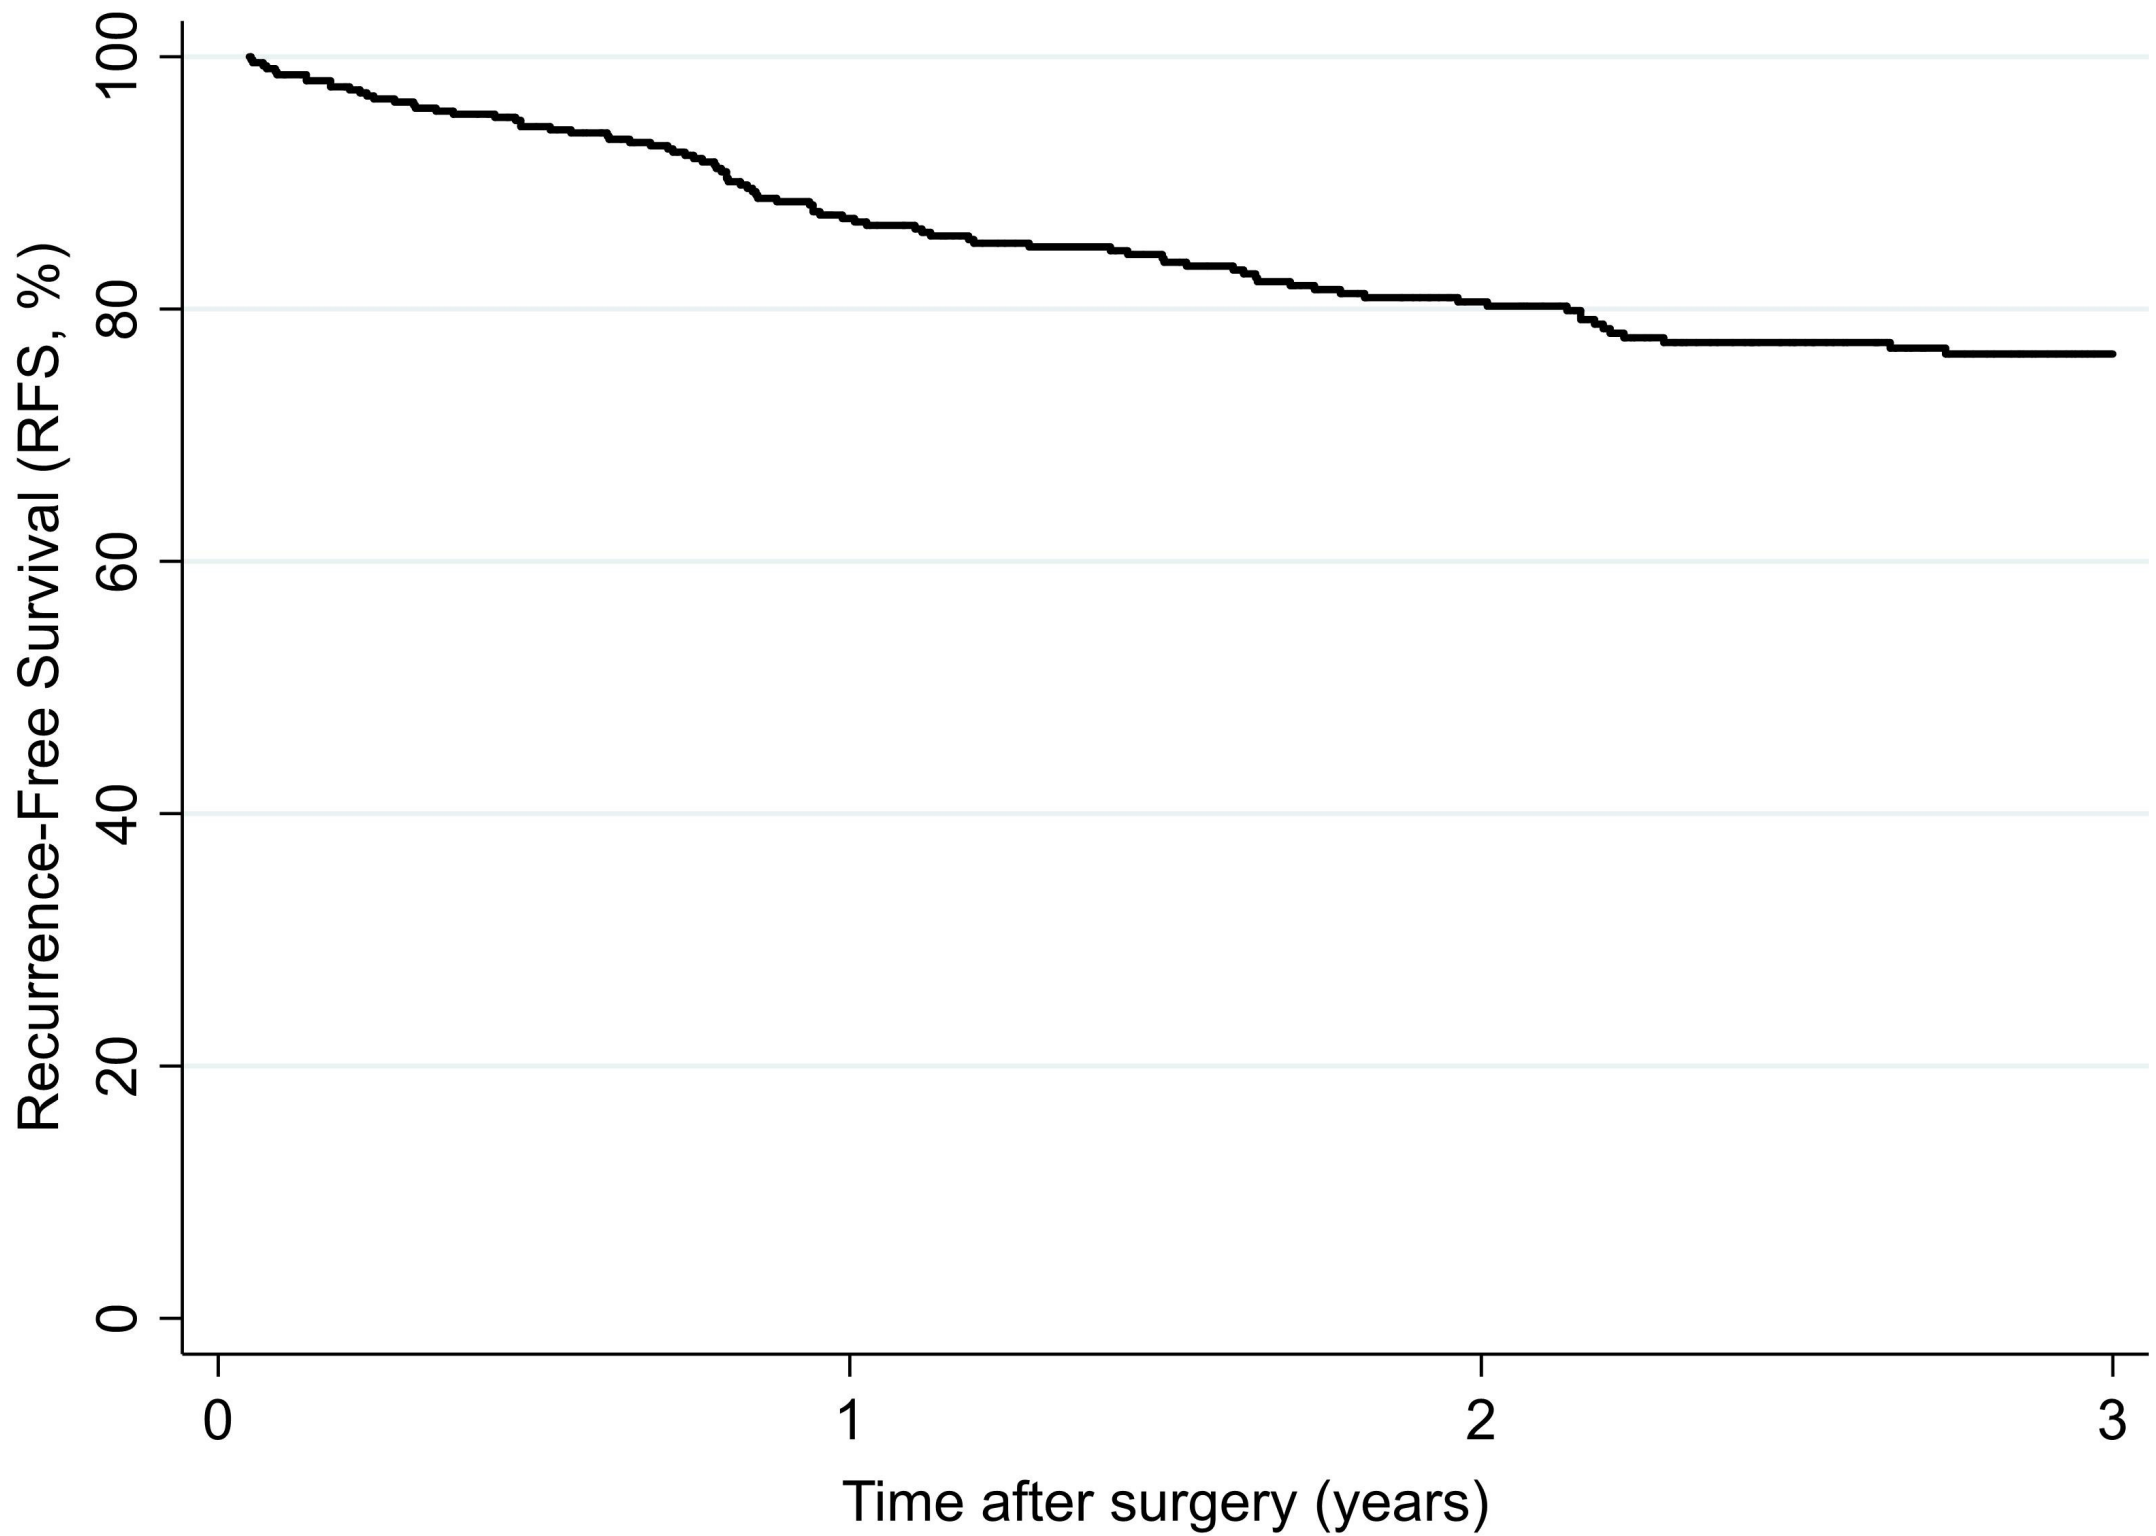

Supplement: MOESM3 [file 16412332]

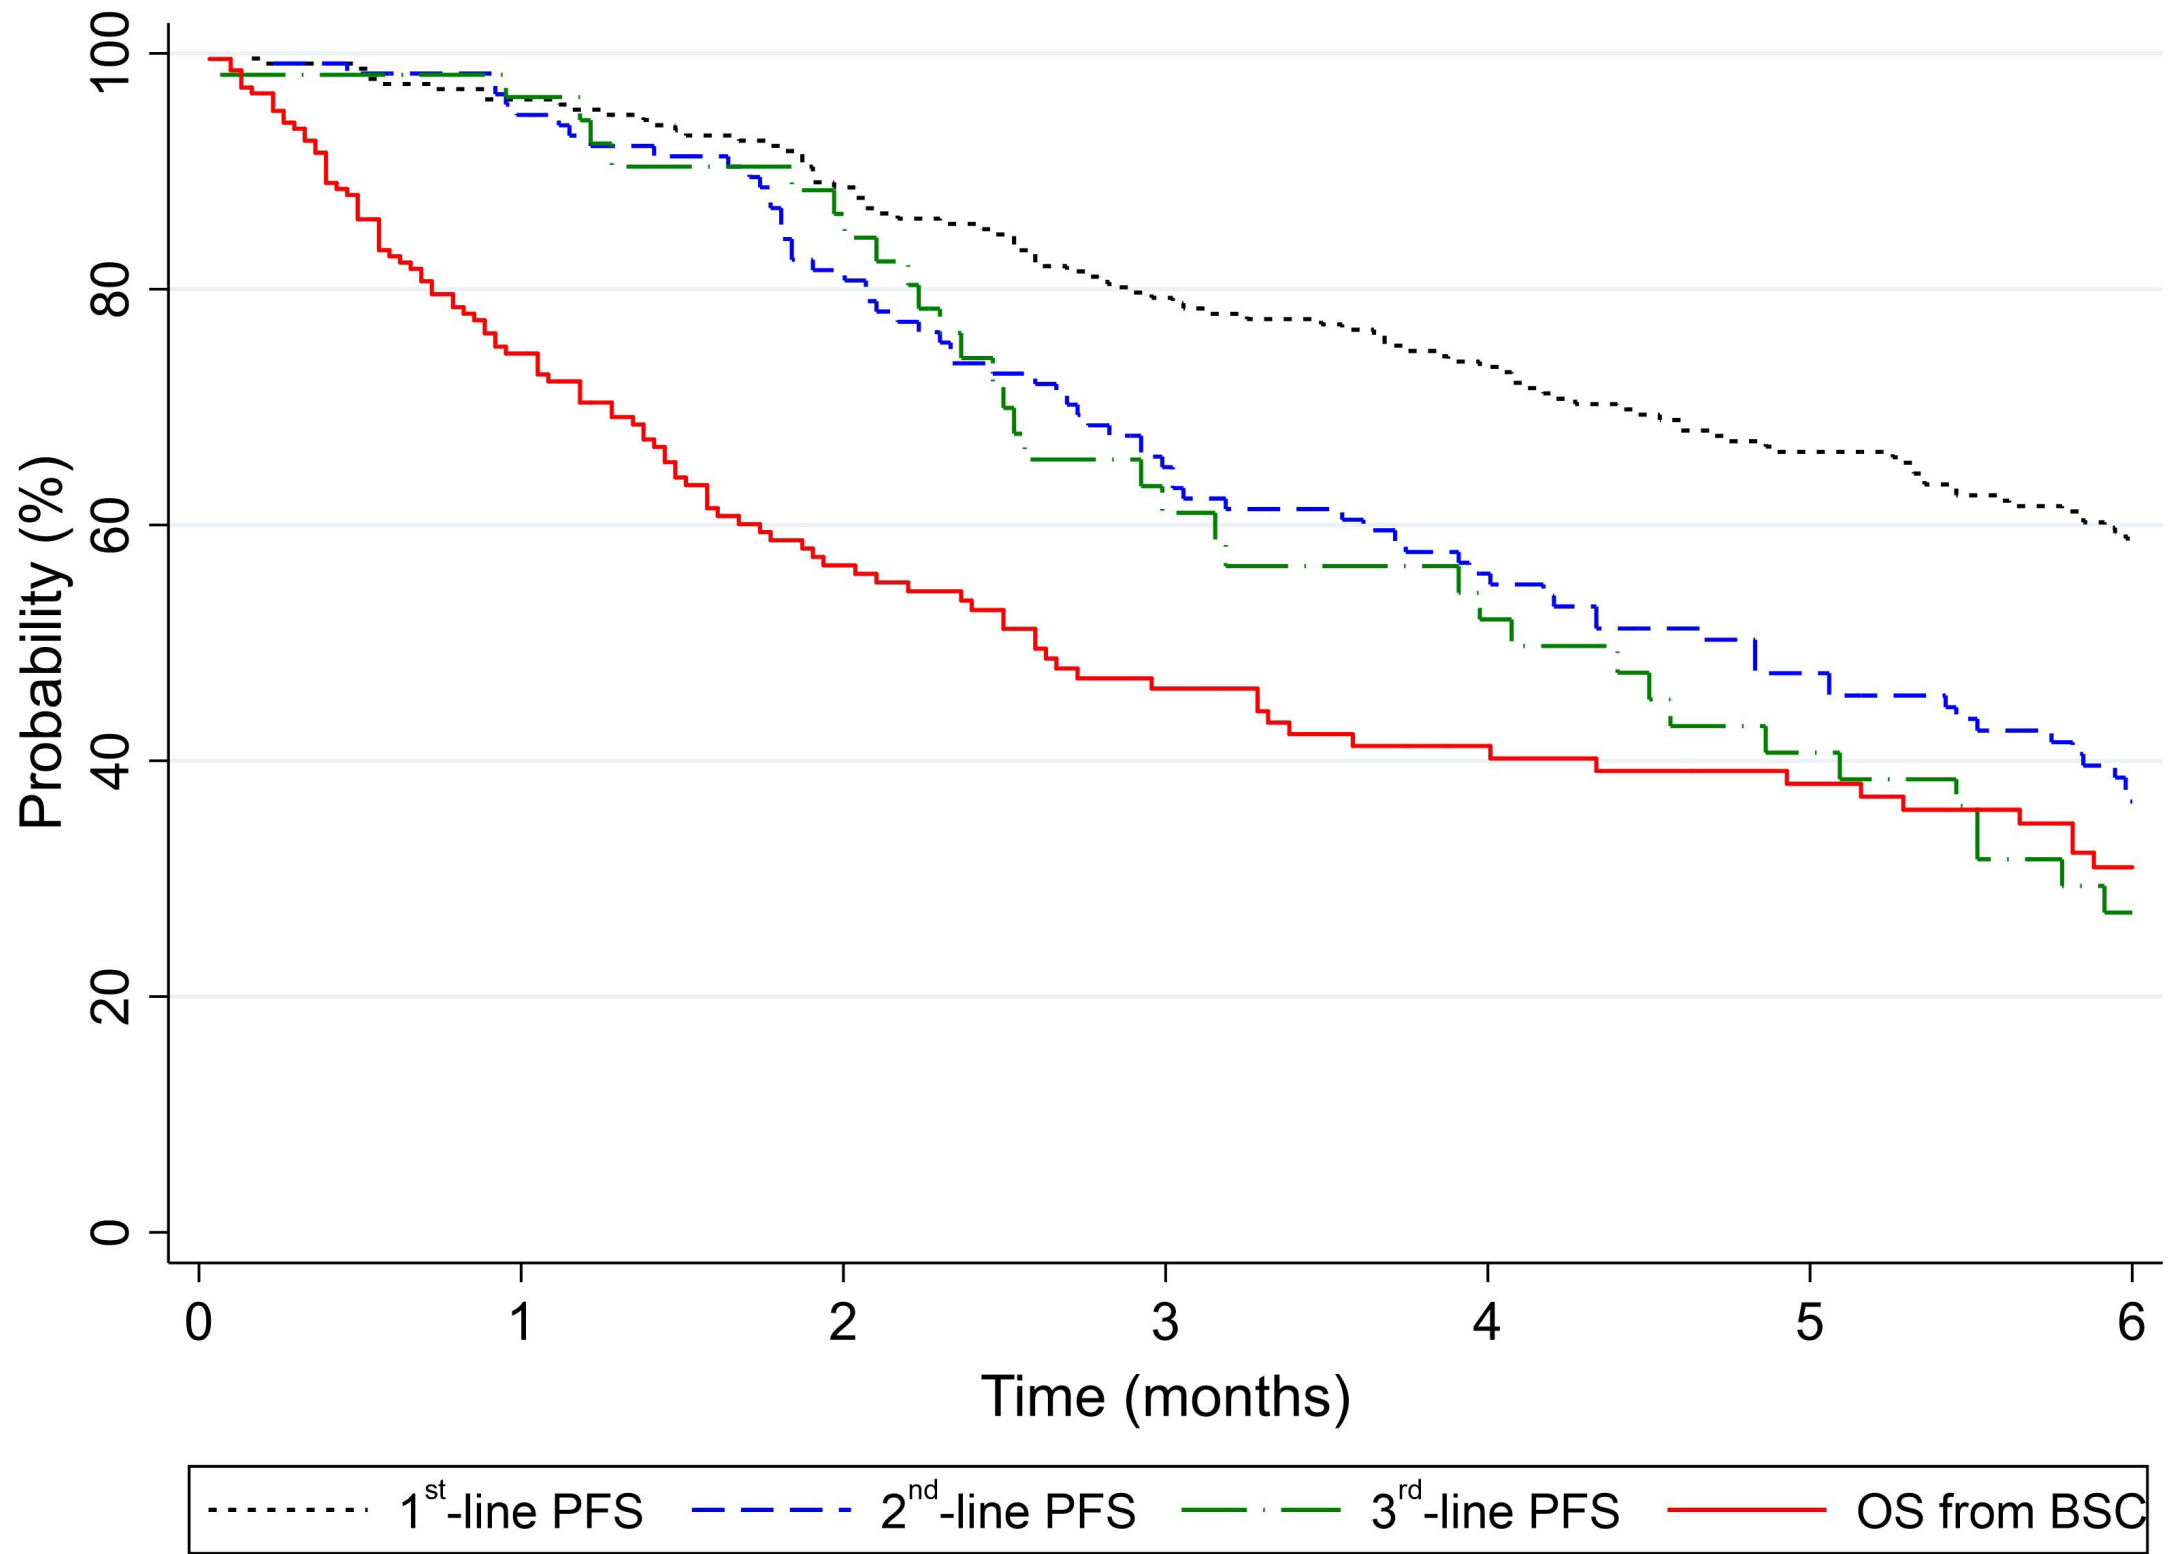

Supplement: MOESM4 [file 16412332]
